# Supplementary material for: Critical disease related to SARS-CoV-2 infection in children from the Amazon region: an observational study
Source: HighWire-hosted journal article supplement (doi:10.1136/bmjpo-2023-001865), 2023-04-01
Supplement: bmjpo-2023-001865supp001_data_supplement.pdf [file bmjpo-2023-001865supp001_data_supplement.pdf]

| Laboratorial and ventilator parameters | Patients with critical disease related to SARS-CoV-2 |                     |                       |                         |                     |                     |
|----------------------------------------|------------------------------------------------------|---------------------|-----------------------|-------------------------|---------------------|---------------------|
|                                        | On first day                                         |                     |                       | On third day            |                     |                     |
|                                        | Severe COVID-19 (n=141)                              | MIS-C (n=67)        | Total                 | Severe COVID-19 (n=141) | MIS-C (n=67)        | Total               |
| <b>Cardiovascular system</b>           |                                                      |                     |                       |                         |                     |                     |
| VIS                                    | 7 (6-38)                                             | 68 (17-105)         | 84 (39-120)           | 6 (2-13)                | 25 (8-74)           | 9 (5-42.5)          |
| Troponin I (ng/L)                      | 0.03 (0.01-0.17)                                     | 0.28 (0.02-1.8)     | 0.11 (0.02-0.44)      | 0.06 (0.01-0.9)         | 0.2 (0.01-13.4)     | 0.1 (0.01-2.25)     |
| <b>Respiratory system</b>              |                                                      |                     |                       |                         |                     |                     |
| DP in cmH <sub>2</sub> O               | 7 (6-8)                                              | 12 (10-16)          | 9 (7-12)              | 8 (5-10)                | 12 (9-16)           | 8 (10-14)           |
| Tidal volume in ml/kg                  | 7.1 (5.7-9.7)                                        | 5.7 (4.9-6.6)       | 7.0 (6.3-9.4)         | 7.2 (5.4-9.6)           | 6.6 (4.1-8.2)       | 7.3 (5.4-9.4)       |
| PIP in cmH <sub>2</sub> O              | 18 (15-20)                                           | 16 (14-27)          | 18 (15-23)            | 16 (12-22)              | 16 (12-24)          | 18 (12-22)          |
| OI                                     | 3.6 (1.9-6)                                          | 8.8 (4.9-13.4)      | 5.3 (2.4-10.3)        | 2.7 (1.2-5.3)           | 6.8 (3.2-11)        | 4.2 (2-7.9)         |
| <b>Inflammatory markers</b>            |                                                      |                     |                       |                         |                     |                     |
| CRP (mg/dL)                            | 7 (2-18)                                             | 45 (18-85)          | 12 (3-36)             | 5 (1.3-12.2)            | 22 (7.3-59)         | 8 (2.4-20)          |
| ESR in mm/h                            | 17 (10-120)                                          | 55 (28-110)         | 33 (10-108)           | 9 (2-17)                | 20 (13-58)          | 17 (10-35)          |
| <b>Haematological system</b>           |                                                      |                     |                       |                         |                     |                     |
| Lymphocytes/mm <sup>3</sup>            | 2,646 (1,398-4,878)                                  | 1,249 (960-1,773)   | 1,874 (1,118-3,772)   | 2,655 (1,268-4,284)     | 2,266 (1,248-4,525) | 2,563 (1,114-4,257) |
| D-Dimer (ng/dL)                        | 1,192 (529-3,406)                                    | 2,014 (1,085-5,009) | 989.6 (522.2-2,790.1) | 854 (406-2,851)         | 1,264 (609-3,861)   | 769.8 (350.8-2,836) |
| <b>Renal system</b>                    |                                                      |                     |                       |                         |                     |                     |
| Creatinine(mg/dL)                      | 0.3 (0.2-0.42)                                       | 0.39 (0.3-0.6)      | 0.40 (0.20-0.56)      | 0.49 (0.3-0.7)          | 0.4 (0.25-0.6)      | 0.5 (0.38-0.67)     |
| <b>Hepatic system</b>                  |                                                      |                     |                       |                         |                     |                     |
| Albumin (g/dL)                         | 2.9 (2.5-3.5)                                        | 2.7 (2.2-3.6)       | 2.7 (2.3-3.5)         | 3.0 (2.5-3.6)           | 2.2 (1.9-3.2)       | 2.7 (2.3-3.5)       |

VIS -vasoactive inotropic score. DP - drive pressure. PIP - peak inspiratory pressure. OI - oxygen index. CRP -C-reactive protein. ESR erythrocyte sedimentation rate. All tests were performed according to the protocols described by the manufacturers. It was chosen to define reference ranges according to age and sex.

Supplementary Table - Laboratorial and ventilator parameters of children and adolescents with critical disease related to SARS-CoV-2 on first and third day from admission
